# Supplementary material
Source: ML conference proceedings conference paper supplement (https://www.ecva.net/papers/eccv_2020/papers_ECCV/html/123510205_ECCV_2020_paper.php)
Supplement: Supplementary file 1 [file 123510205-supp.pdf]

## A Path Constraints

**Lemma 2 (Paths Constraints).** *Let  $G' = (V', E', w) = (V \cup T, E \cup E^S, w)$  be an edge-weighted graph extended by terminal nodes  $T$ . For any edge indicator  $y \in 0, 1^{|E \cup S|}$  that satisfies*

$$\sum_{t \in T} y_{tv} = |T| - 1 \forall v \in V \quad (36)$$

the following set of constraints are equivalent:

$$y_{ut} + y_{uv} + y_{vt'} \geq 1 \quad \forall (u, v) \in E \forall t, t' \in T, t \neq t' \quad (37)$$

$$\Leftrightarrow y_{tu} + y_{uv} \geq y_{tv}, \quad \forall uv \in E, t \in T \quad (38)$$

$$y_{tv} + y_{uv} \geq y_{tu}, \quad \forall uv \in E, t \in T. \quad (39)$$

*Proof.* This lemma is trivially fulfilled for  $|T| \leq 1$ . We will prove the lemma for  $|T| > 1$  by contradiction in each direction.

“ $\Rightarrow$ ” Assume eq. (37) holds and  $\exists y_{tv} > y_{tu} + y_{uv}$ . In case  $y_{tv} = 1$ , eq. (36) implies that  $\exists t' \neq t : y_{tv} = 0$  which leads to the contradiction

$$y_{tv} > y_{tu} + y_{uv} \geq 1 - y_{t'u} = 1 \quad (40)$$

In case  $y_{tv} = 0$ , eq. (36) implies that  $\forall t' \neq t : y_{t'v} = 0$  leading to the contradiction

$$y_{tv} > y_{tu} + y_{uv} \geq 1 - y_{t'u} = 0. \quad (41)$$

The proof for eq. (39) is analogous.

“ $\Leftarrow$ ” Assume eqs. (38) and (39) hold and  $\exists (u, v) \in E, t, t' \in T, t \neq t' : y_{ut} + y_{uv} + y_{vt'} < 1$ . This leads to the contradiction

$$y_{ut} + y_{uv} + y_{vt'} < 1 \quad (42)$$

$$\Rightarrow y_{ut} = 0, y_{uv} = 0 \text{ and } \underbrace{y_{vt'}}_{\Rightarrow y_{vt}=1} = 0 \quad (43)$$

$$\Rightarrow 1 = y_{vt} \geq y_{ut} + y_{uv} = 0. \quad (44)$$
